# Supplementary material for: D–A–π–A featured sensitizers containing an auxiliary acceptor of benzoxadiazole: molecular engineering and co-sensitization
Source: Royal Society of Chemistry journal article supplement (doi:10.1039/c5ta01371b), 2015-01-01
Supplement: c5ta01371b1.pdf [file c5ta01371b1.pdf]

*Electronic Supplementary Information (ESI)*

## **D–A– $\pi$ –A featured sensitizers containing auxiliary acceptor of benzoxadiazole: molecular engineering and co-sensitization**

Haibo Zhu,<sup>‡</sup> Yongzhen Wu,<sup>‡</sup> Jingchuan Liu, Weiwei Zhang, Wenjun Wu and Wei-Hong Zhu\*

*Shanghai Key Laboratory of Functional Materials Chemistry, Key Laboratory for Advanced Materials and Institute of Fine Chemicals, Collaborative Innovation Center for Coal Based Energy (i-CCE), East China University of Science and Technology, Shanghai 200237, P. R. China; E-mail: [whzhu@ecust.edu.cn](mailto:whzhu@ecust.edu.cn)*

<sup>‡</sup>These authors contributed equally to this work.

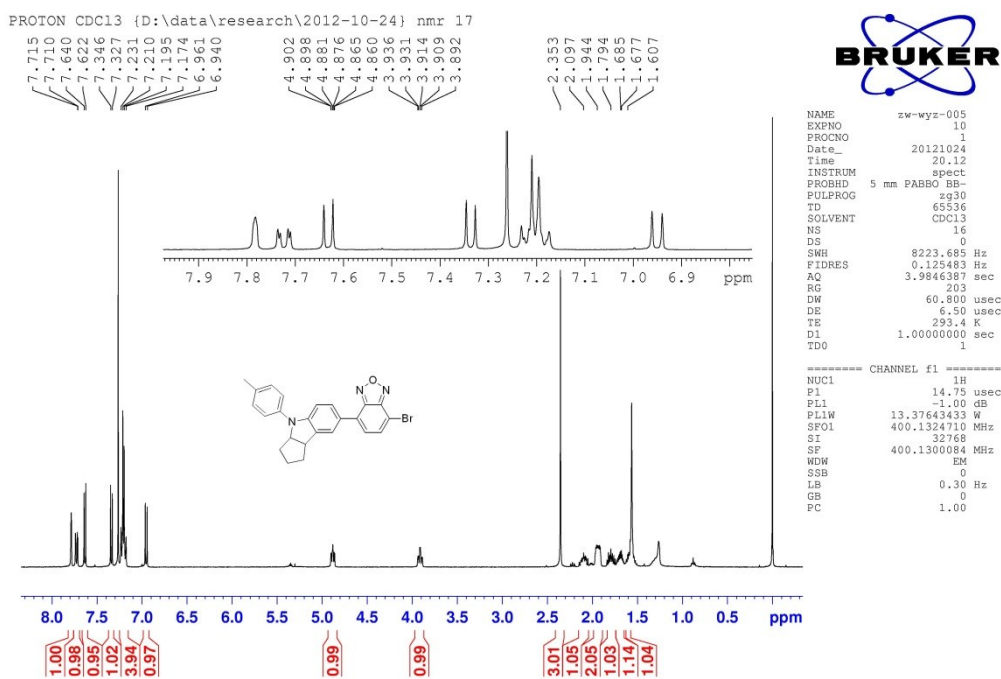

Fig. S1  $^1\text{H}$  NMR of compound 1 in  $\text{CDCl}_3$

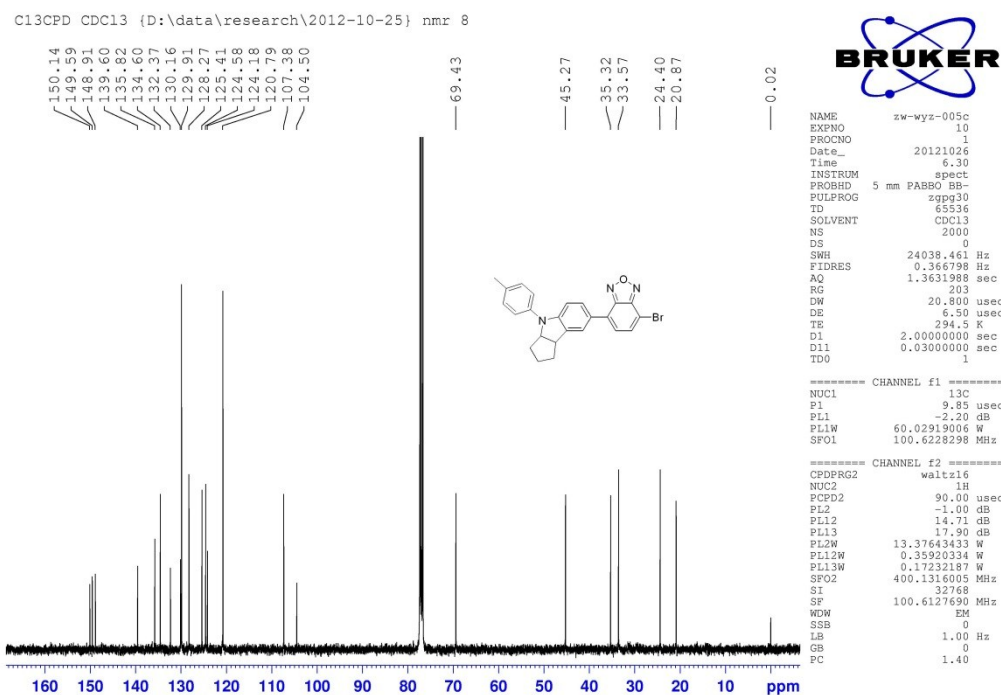

Fig. S2  $^{13}\text{C}$  NMR of compound 1 in  $\text{CDCl}_3$

## Single Mass Analysis

Tolerance = 50.0 mDa / DBE: min = -1.5, max = 100.0

Element prediction: Off

Number of isotope peaks used for i-FIT = 2

Monoisotopic Mass, Odd and Even Electron Ions

112 formula(e) evaluated with 35 results within limits (up to 1 closest results for each mass)

Elements Used:

C: 0-40 H: 0-40 N: 0-3 O: 0-3 Br: 0-1

WH-ZHU

ECUST institute of Fine Chem

26-Oct-2012

16:50:50

ZWH-ZHB-02 52 (1.675) Cm (47:52)

1: TOF MS ES+

1.88e+003

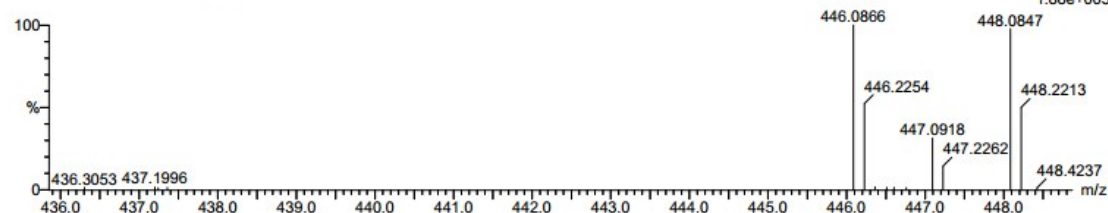

Minimum: -1.5  
Maximum: 100.0

| Mass     | Calc. Mass | mDa  | PPM  | DBE  | i-FIT | i-FIT (Norm) | Formula                                             |
|----------|------------|------|------|------|-------|--------------|-----------------------------------------------------|
| 446.0866 | 446.0868   | -0.2 | -0.4 | 15.5 | 60.4  | 0.0          | C <sub>24</sub> H <sub>21</sub> N <sub>3</sub> O Br |

Fig. S3 HRMS of compound 1

PROTON CDC13 {D:\data\research\2012-10-29} nmr 29

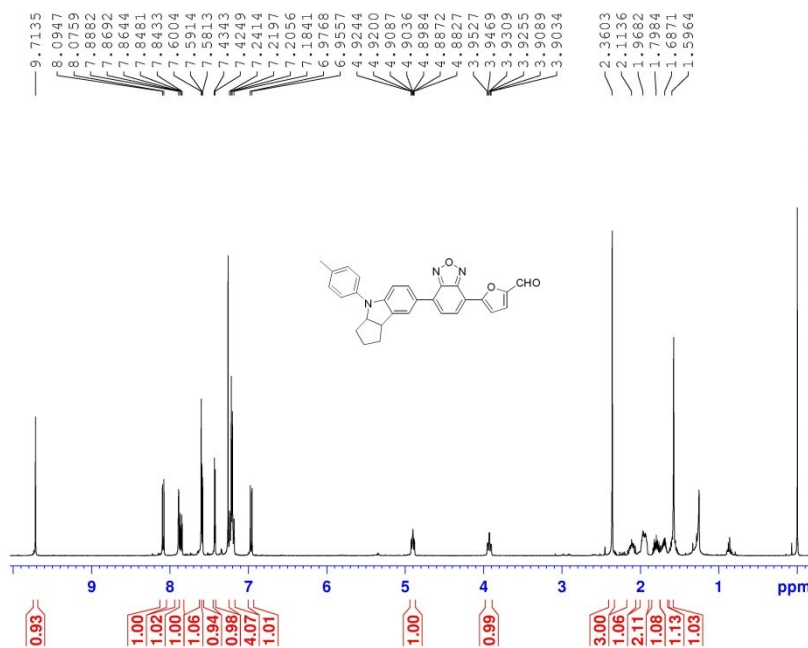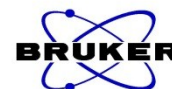

```

NAME zw-wyz-006
EXPNO 10
PROCNO 1
Date_ 20121029
Time 17.26
INSTRUM spect
PROBHD 5 mm PABBO BB-
PULPROG zg30
TD 65536
SOLVENT CDC13
NS 16
DS 0
SWH 8223.685 Hz
FIDRES 0.125483 Hz
AQ 3.9846387 sec
RG 203
DW 60.800 usec
DE 6.50 usec
TE 293.5 K
D1 1.00000000 sec
TDO 1
===== CHANNEL f1 =====
NUC1 1H
P1 14.75 usec
PL1 -1.00 dB
PL1W 13.37643433 W
SF01 400.1324710 MHz
SI 32768
SE 400.1300087 MHz
WDW EM
SSB 0
LB 0.30 Hz
GB 0
PC 1.00

```

Fig. S4 <sup>1</sup>H NMR of compound 2 in CDCl<sub>3</sub>

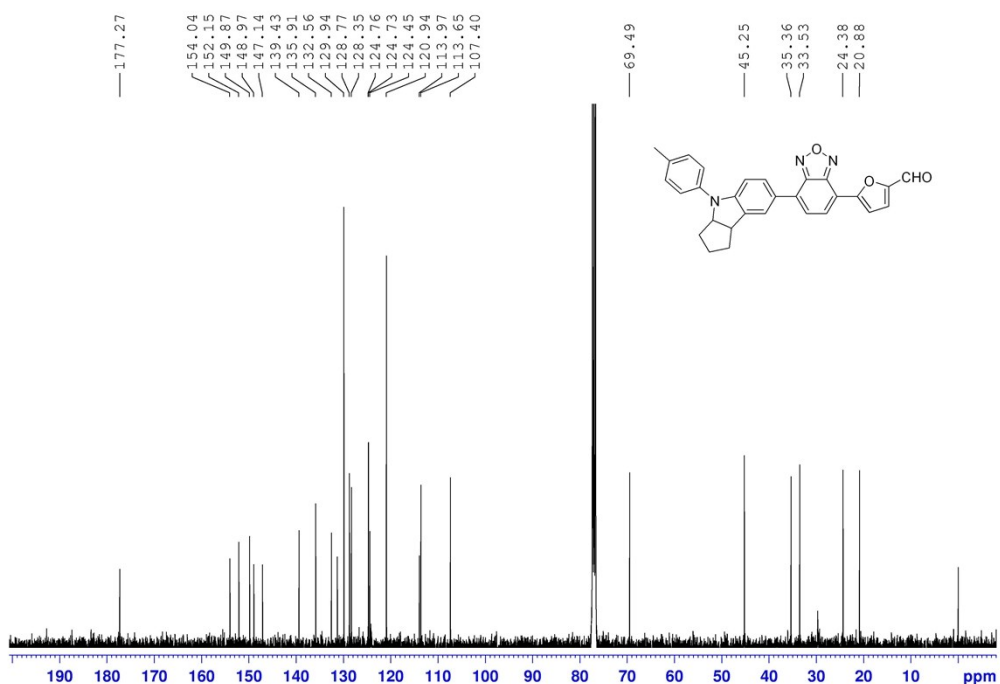

Fig. S5  $^{13}\text{C}$  NMR of compound **2** in  $\text{CDCl}_3$

### Elemental Composition Report

Page 1

#### Single Mass Analysis

Tolerance = 50.0 mDa / DBE: min = -1.5, max = 100.0

Element prediction: Off

Number of isotope peaks used for i-FIT = 2

Monoisotopic Mass, Even Electron Ions

25 formula(e) evaluated with 1 results within limits (up to 1 closest results for each mass)

Elements Used:

C: 0-29 H: 0-70 N: 0-3 O: 0-3

WH-ZHU

ECUST institute of Fine Chem

01-Nov-2012

20:19:08

1: TOF MS ES+

5.14e+003

ZW-WYZ-4 28 (0.937) Cm (24:30)

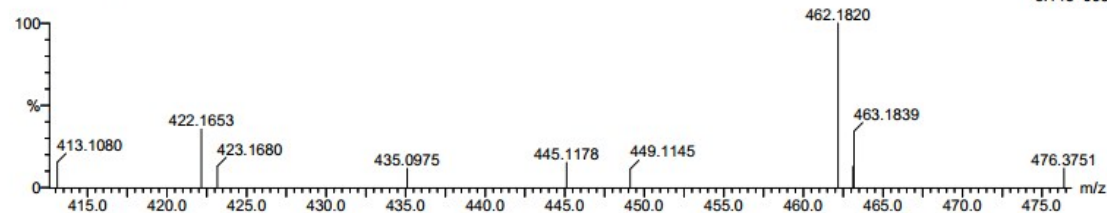

Minimum: -1.5  
Maximum: 100.0

| Mass     | Calc. Mass | mDa | PPM | DBE  | i-FIT | i-FIT (Norm) | Formula                                                       |
|----------|------------|-----|-----|------|-------|--------------|---------------------------------------------------------------|
| 462.1820 | 462.1818   | 0.2 | 0.4 | 19.5 | 21.0  | 0.0          | C <sub>29</sub> H <sub>24</sub> N <sub>3</sub> O <sub>3</sub> |

Fig. S6 HRMS of compound **2**

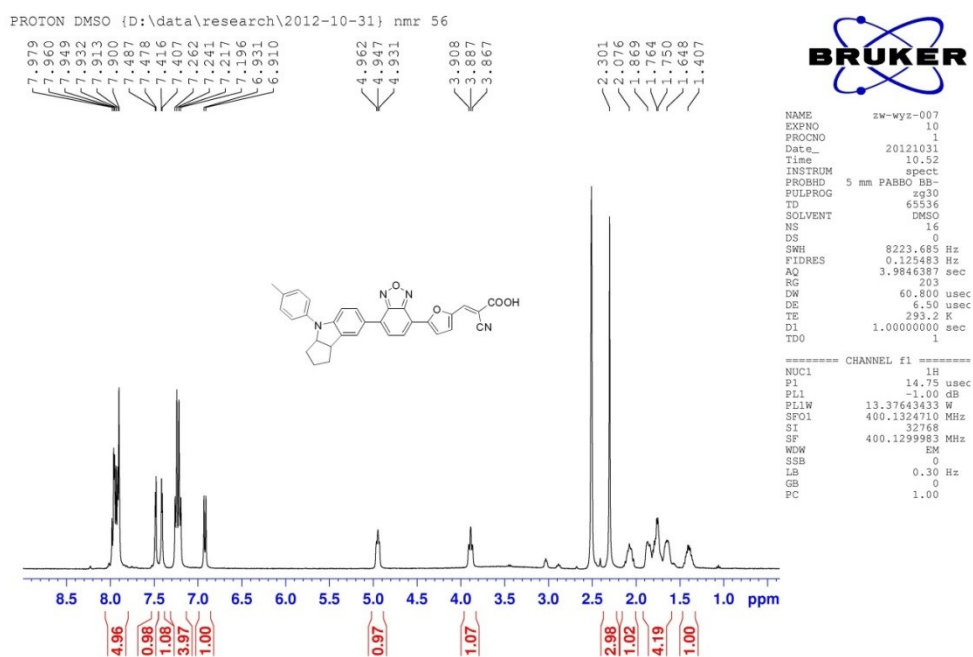

Fig. S7  $^1\text{H}$  NMR of WS-24 in  $\text{DMSO-}d_6$

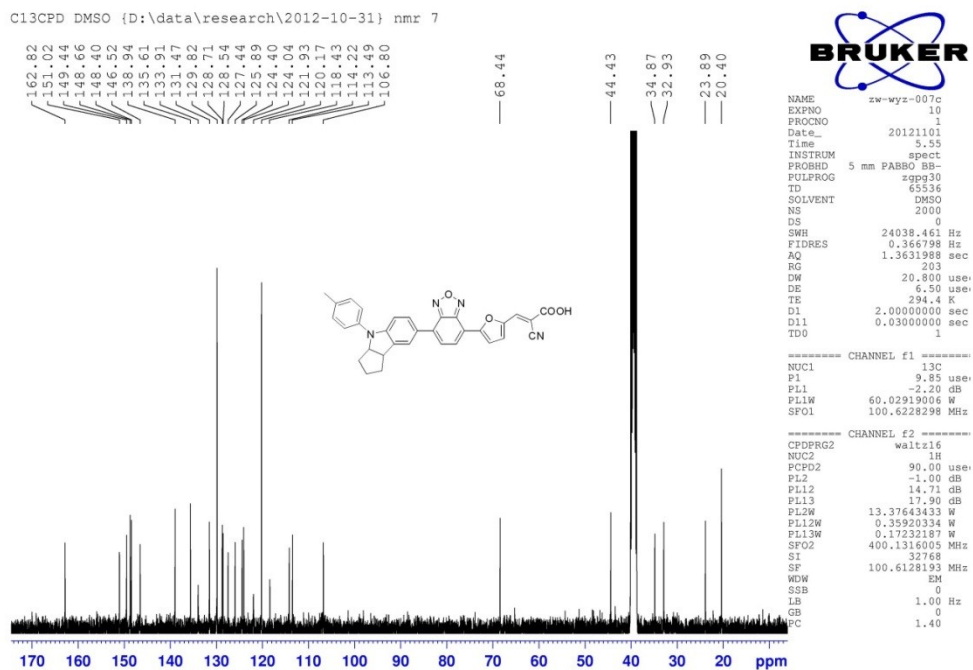

Fig. S8  $^{13}\text{C}$  NMR of WS-24 in  $\text{DMSO-}d_6$

## Single Mass Analysis

Tolerance = 50.0 mDa / DBE: min = -1.5, max = 100.0

Element prediction: Off

Number of isotope peaks used for i-FIT = 2

Monoisotopic Mass, Even Electron Ions

33 formula(e) evaluated with 1 results within limits (up to 1 closest results for each mass)

Elements Used:

C: 0-32 H: 0-70 N: 0-4 O: 0-4

WH-ZHU

ECUST Institute of Fine Chem

01-Nov-2012

20:32:05

1: TOF MS ES+

1.72e+003

ZW-WYZ-6 6 (0.274) Cm (5:8)

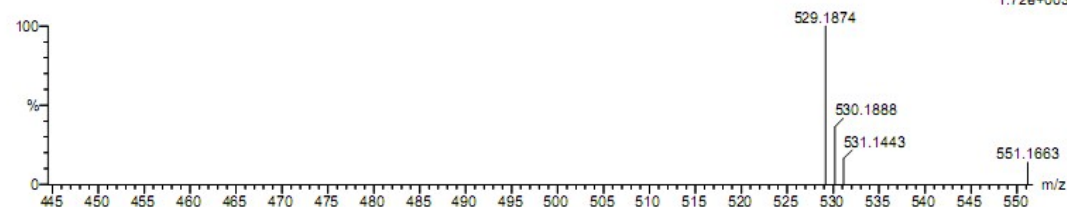

| Mass     | Calc. Mass | mDa  | PFM  | DBE  | i-FIT | i-FIT (Norm) | Formula       |
|----------|------------|------|------|------|-------|--------------|---------------|
| 529.1874 | 529.1876   | -0.2 | -0.4 | 22.5 | 8.0   | 0.0          | C32 H25 N4 O4 |

Fig. S9 HRMS of compound WS-24

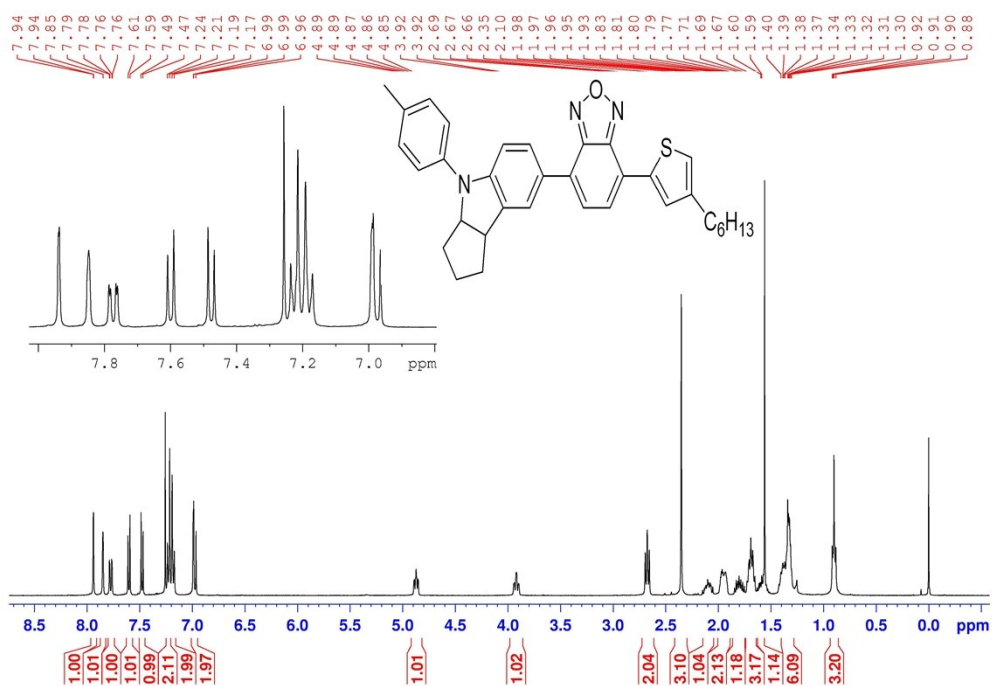Fig. S10  $^1\text{H}$  NMR of compound **3** in  $\text{CDCl}_3$

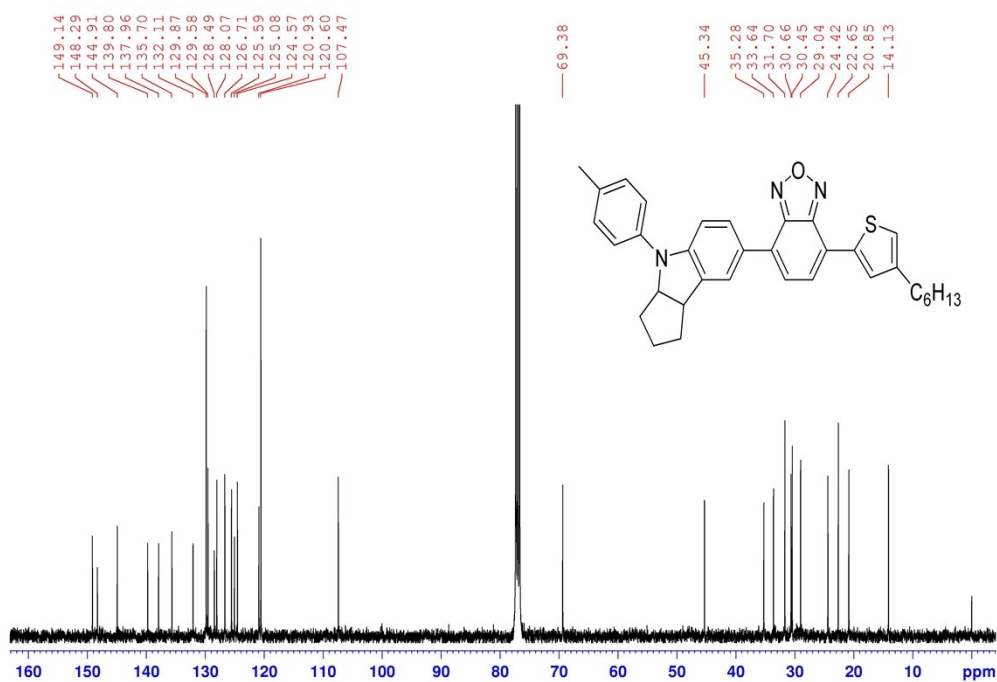

Fig. S11 <sup>13</sup>C NMR of compound 3 in CDCl<sub>3</sub>

### Elemental Composition Report

Page 1

#### Single Mass Analysis

Tolerance = 30.0 mDa / DBE: min = -1.5, max = 100.0

Element prediction: Off

Number of isotope peaks used for i-FIT = 2

Monoisotopic Mass, Even Electron Ions

260 formula(e) evaluated with 16 results within limits (up to 1 closest results for each mass)

Elements Used:

C: 0-45 H: 0-40 N: 0-4 O: 0-4 S: 0-2

WH-ZHU

ECUST institute of Fine Chem

09-Oct-2013

15:03:32

1: TOF MS ES+

7.12e+003

ZWH-ZHB-3 35 (0.314) Cm (28:36)

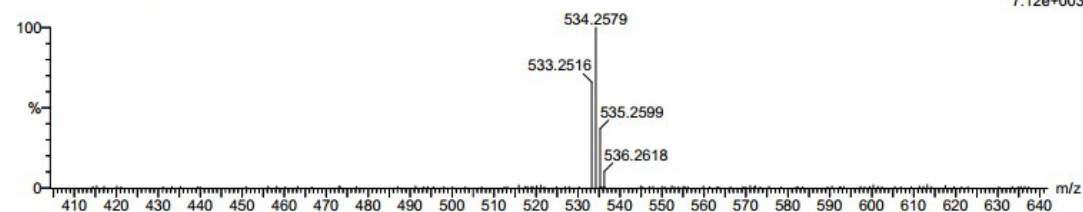

Minimum: -1.5  
Maximum: 30.0 50.0 100.0

| Mass     | Calc. Mass | mDa | PPM | DBE  | i-FIT | i-FIT (Norm) | Formula        |
|----------|------------|-----|-----|------|-------|--------------|----------------|
| 534.2579 | 534.2579   | 0.0 | 0.0 | 18.5 | 73.2  | 0.0          | C34 H36 N3 O S |

Fig. S12 HRMS of compound 3

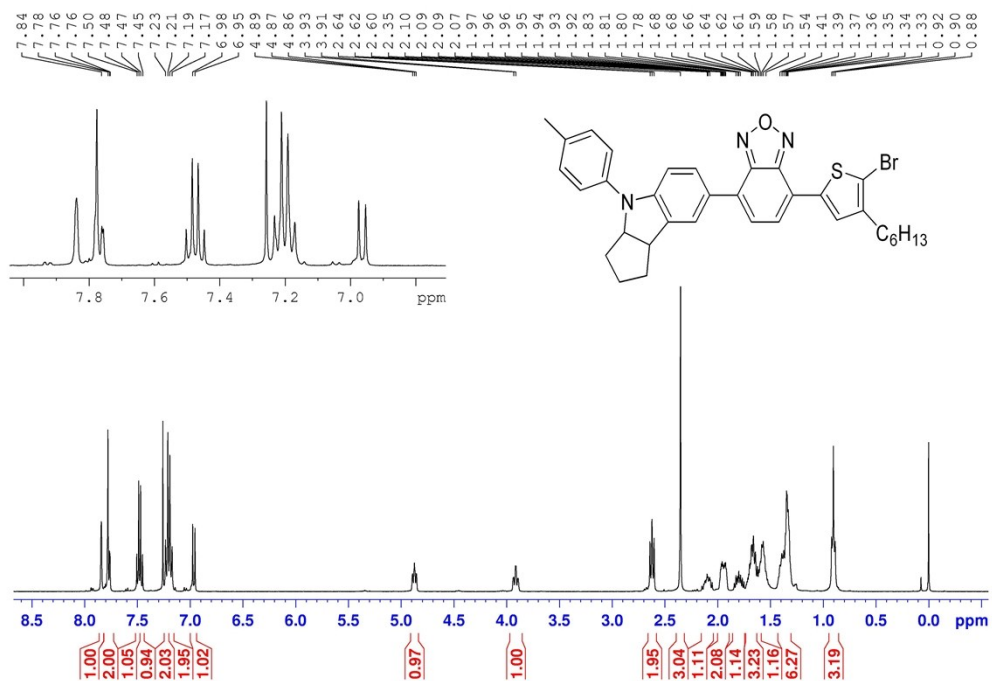

Fig. S13 <sup>1</sup>H NMR of compound 4 in CDCl<sub>3</sub>

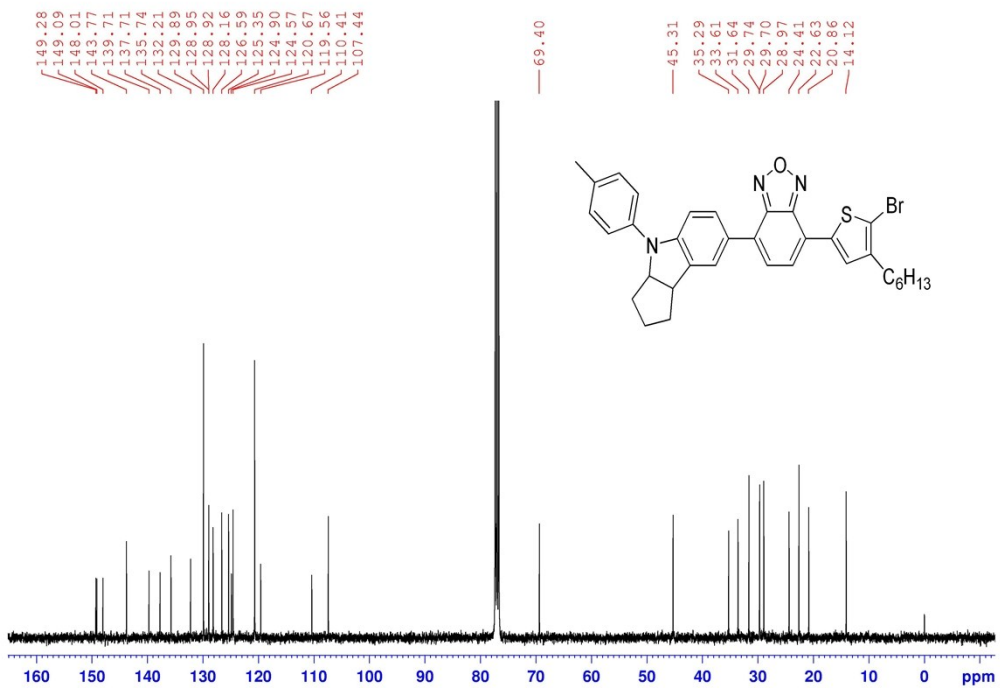

Fig. S14 <sup>13</sup>C NMR of compound 4 in CDCl<sub>3</sub>



## Single Mass Analysis

Tolerance = 50.0 PPM / DBE: min = -1.5, max = 100.0

Element prediction: Off

Number of isotope peaks used for i-FIT = 2

Monoisotopic Mass, Even Electron Ions

27 formula(e) evaluated with 2 results within limits (up to 1 best isotopic matches for each mass)

Elements Used:

C: 0-36 H: 0-40 N: 0-3 O: 0-1 S: 0-1 Br: 0-1

WH-ZHU

ECUST institute of Fine Chem

09-Oct-2013

ZWH-ZHB-4 83 (0.608) Cm (80:84)

15:08:32

1: TOF MS ES+

2.40e+003

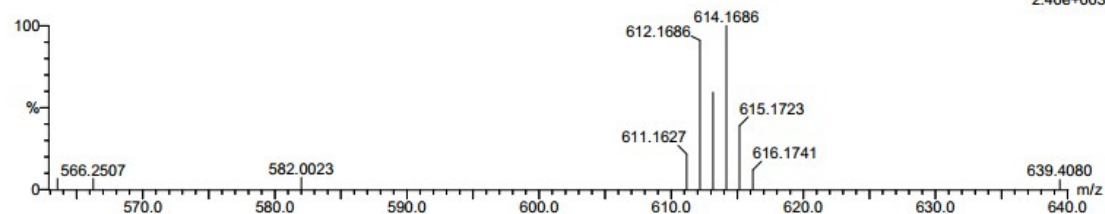

| Minimum: | Maximum:   |       |      |       |       |              |                   |  |
|----------|------------|-------|------|-------|-------|--------------|-------------------|--|
|          |            | 300.0 | 50.0 | -1.5  |       |              |                   |  |
|          |            |       |      | 100.0 |       |              |                   |  |
| Mass     | Calc. Mass | mDa   | PPM  | DBE   | i-FIT | i-FIT (Norm) | Formula           |  |
| 612.1686 | 612.1684   | 0.2   | 0.3  | 18.5  | 15.0  | 0.0          | C34 H35 N3 O S Br |  |

Fig. S15 HRMS of compound 4

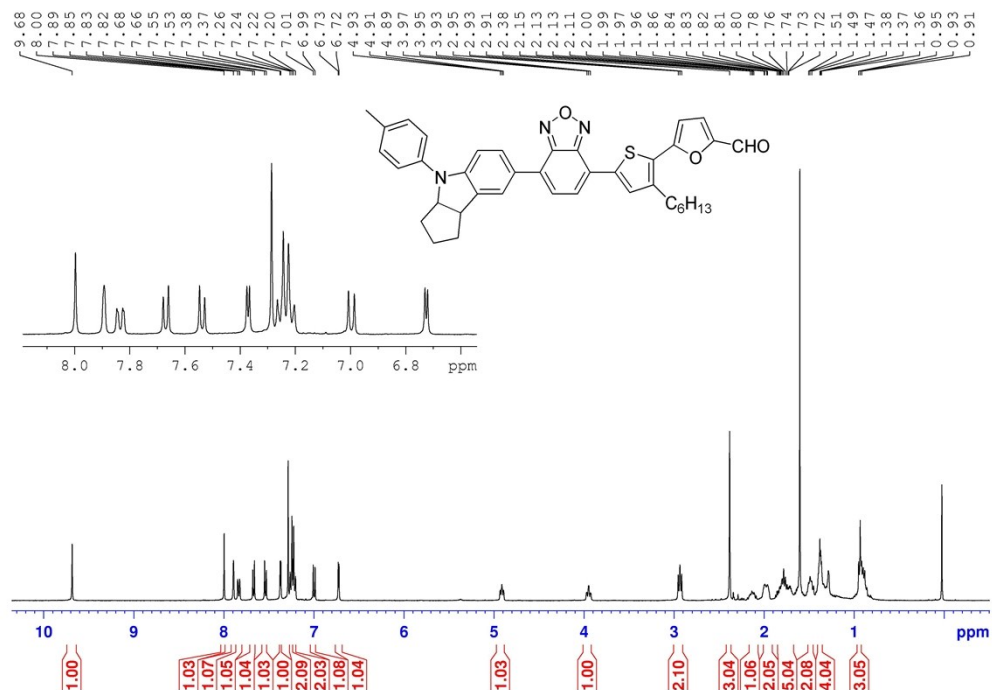Fig. S16 <sup>1</sup>H NMR of compound 5 in CDCl<sub>3</sub>

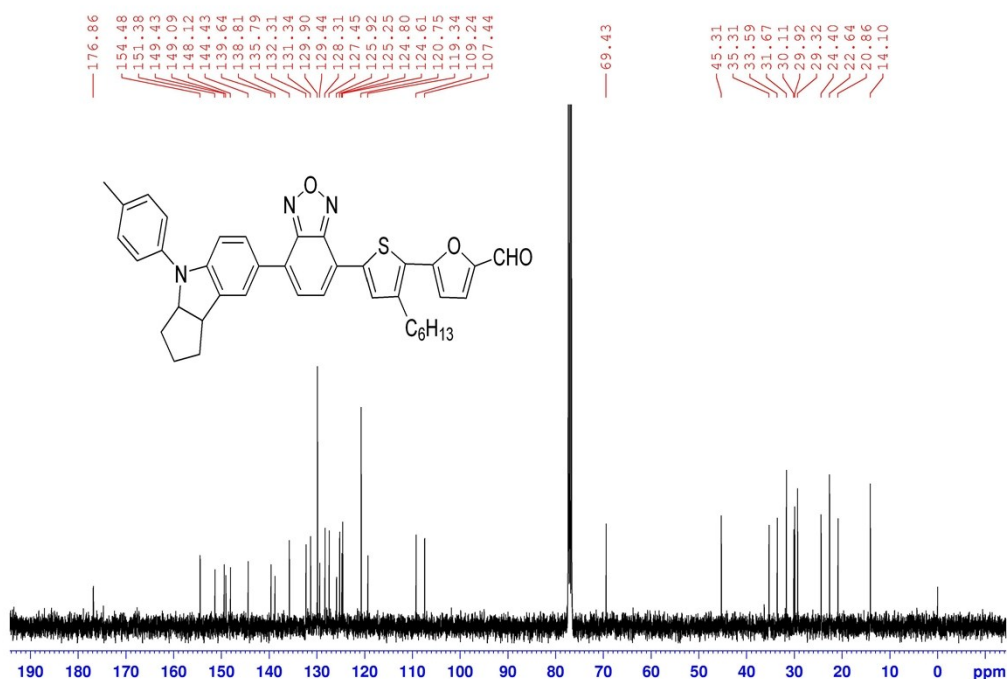

Fig. S17  $^{13}\text{C}$  NMR of compound 5 in  $\text{CDCl}_3$

Elemental Composition Report

Page 1

Single Mass Analysis

Tolerance = 30.0 mDa / DBE: min = -1.5, max = 100.0

Element prediction: Off

Number of isotope peaks used for i-FIT = 2

Monoisotopic Mass, Even Electron Ions

199 formula(e) evaluated with 11 results within limits (up to 1 closest results for each mass)

Elements Used:

C: 0-45 H: 0-40 N: 0-4 O: 0-4 S: 0-2

WH-ZHU

ECUST institute of Fine Chem

09-Oct-2013

15:16:31

1: TOF MS ES+

8.24e+003

ZWH-ZHB-5 65 (0.494) Cm (65.69)

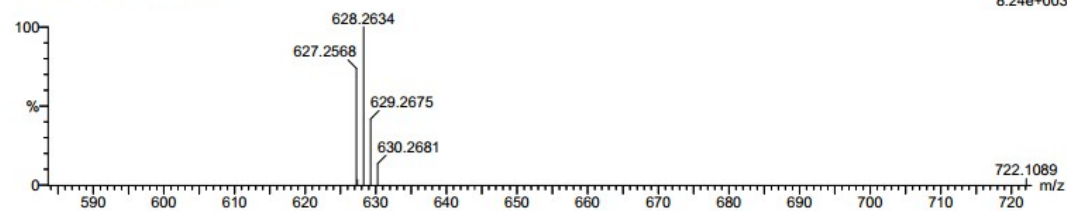

Minimum: -1.5  
Maximum: 100.0

| Mass     | Calc. Mass | mDa | PPM | DBE  | i-FIT | i-FIT (Norm) | Formula                                                  |
|----------|------------|-----|-----|------|-------|--------------|----------------------------------------------------------|
| 628.2634 | 628.2634   | 0.0 | 0.0 | 22.5 | 11.6  | 0.0          | $\text{C}_{39}\text{H}_{38}\text{N}_3\text{O}_3\text{S}$ |

Fig. S18 HRMS of compound 5

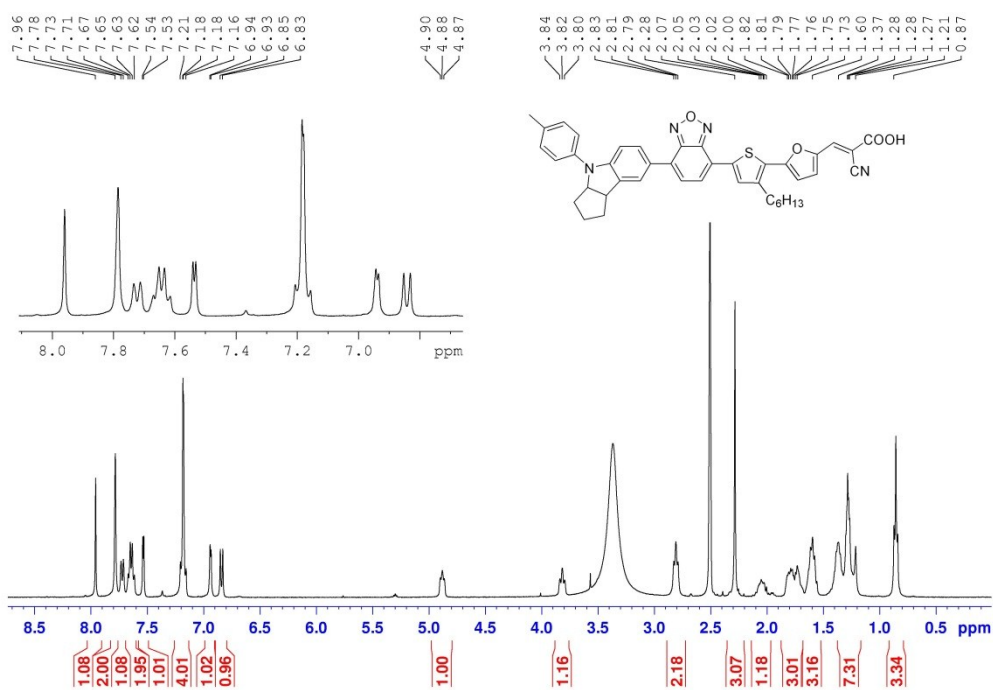

**Fig. S19** <sup>1</sup>H NMR of WS-26 in DMSO-*d*<sub>6</sub>

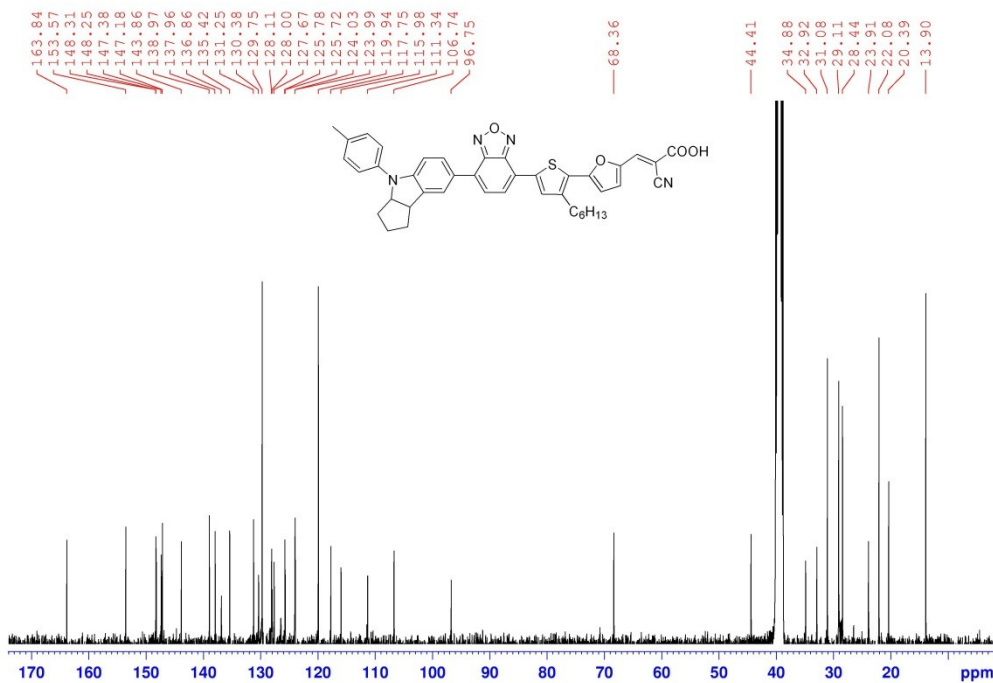

**Fig. S20** <sup>13</sup>C NMR of dye WS-26 in DMSO-*d*<sub>6</sub>

## Single Mass Analysis

Tolerance = 1000.0 mDa / DBE: min = -1.5, max = 100.0

Element prediction: Off

Number of isotope peaks used for i-FIT = 2

Monoisotopic Mass, Odd and Even Electron Ions

34 formula(e) evaluated with 1 results within limits (up to 1 best isotopic matches for each mass)

Elements Used:

C: 0-42 H: 0-40 N: 0-4 O: 0-4 S: 0-1

WH-ZHU

ECUST institute of Fine Chem

23-Mar-2015

08:35:59

1: TOF MS ES+

1.40e+004

ZWH-ZHB-2 199 (1.309) Cm (196:200)

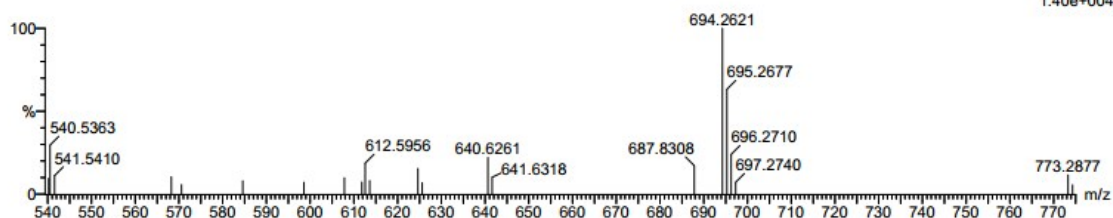

Minimum: -1.5  
 Maximum: 1000.0 50.0 100.0

| Mass     | Calc. Mass | mDa | PPM | DBE  | i-FIT | i-FIT (Norm) | Formula         |
|----------|------------|-----|-----|------|-------|--------------|-----------------|
| 694.2621 | 694.2614   | 0.7 | 1.0 | 26.0 | 17.6  | 0.0          | C42 H38 N4 O4 S |

Fig. S21 HRMS of WS-26
